# Supplementary material for: An electrochemical immunosensor based on a nanostructured lanthanum oxide-substituted reduced graphene oxide interface for ultralow ciprofloxacin detection in milk samples
Source: Royal Society of Chemistry journal article supplement (doi:10.1039/d3ma00556a), 2023-12-12
Supplement: d3ma00556a1.pdf [file d3ma00556a1.pdf]

## *Electrochemical Immunosensor based on Nanostructured Lanthanum oxide substituted reduced graphene oxide Interface for Ultralow Ciprofloxacin Detection in Spiked Milk Samples*

Navneet Chaudhary,<sup>1,2@</sup> Amit K. Yadav,<sup>1@</sup> Damini Verma,<sup>1</sup> Jai Gopal Sharma,<sup>2</sup> Partima R Solanki<sup>1\*</sup>

<sup>1</sup>Nano-Bio Laboratory, Special Centre for Nanoscience, Jawaharlal Nehru University, New Delhi-110067, India

<sup>2</sup>Department of Biotechnology, Delhi Technological University, New Delhi-110042, India

**\*Corresponding Author:**

**E-mail:** [pratimarsolanki@gmail.com](mailto:pratimarsolanki@gmail.com); [partima@mail.jnu.ac.in](mailto:partima@mail.jnu.ac.in)

**Tel:** 011-26704740/26704699

@ Authors contributed equally to this work.

### SUPPLEMENTARY INFORMATION

XRD spectra of nLa<sub>2</sub>O<sub>3</sub> NPs

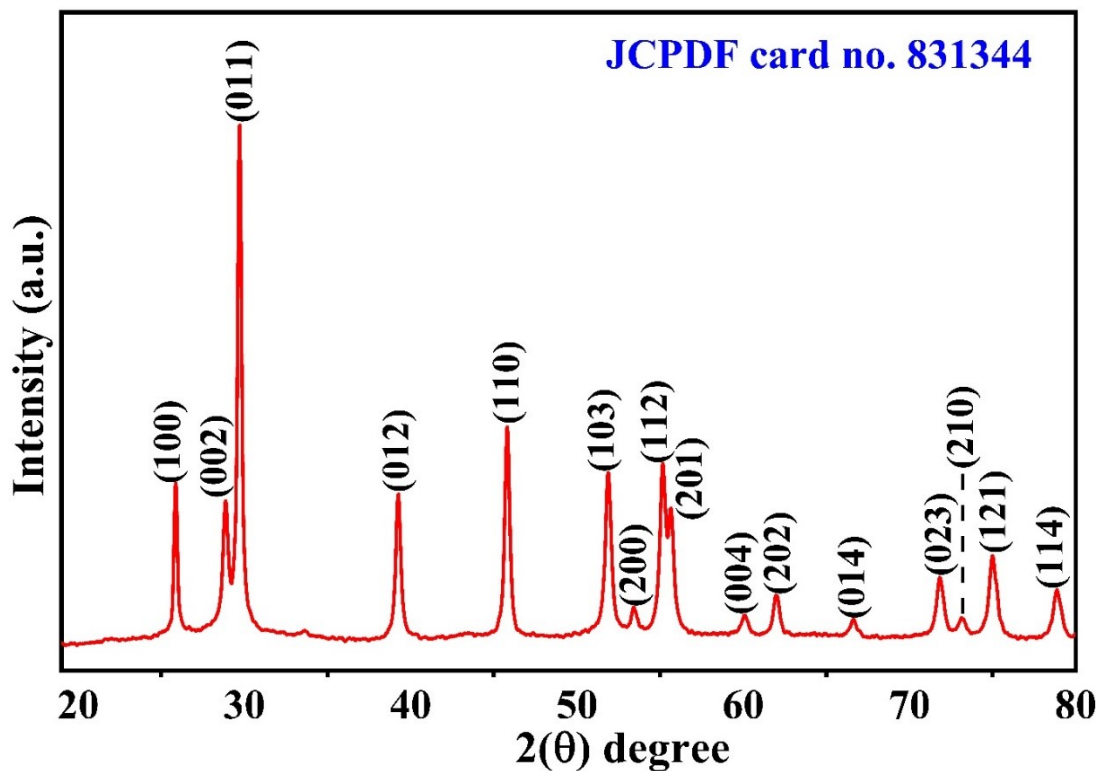

**Figure S1:** XRD spectra of nLa<sub>2</sub>O<sub>3</sub> NPs

## Raman spectra of nLa<sub>2</sub>O<sub>3</sub> NPs

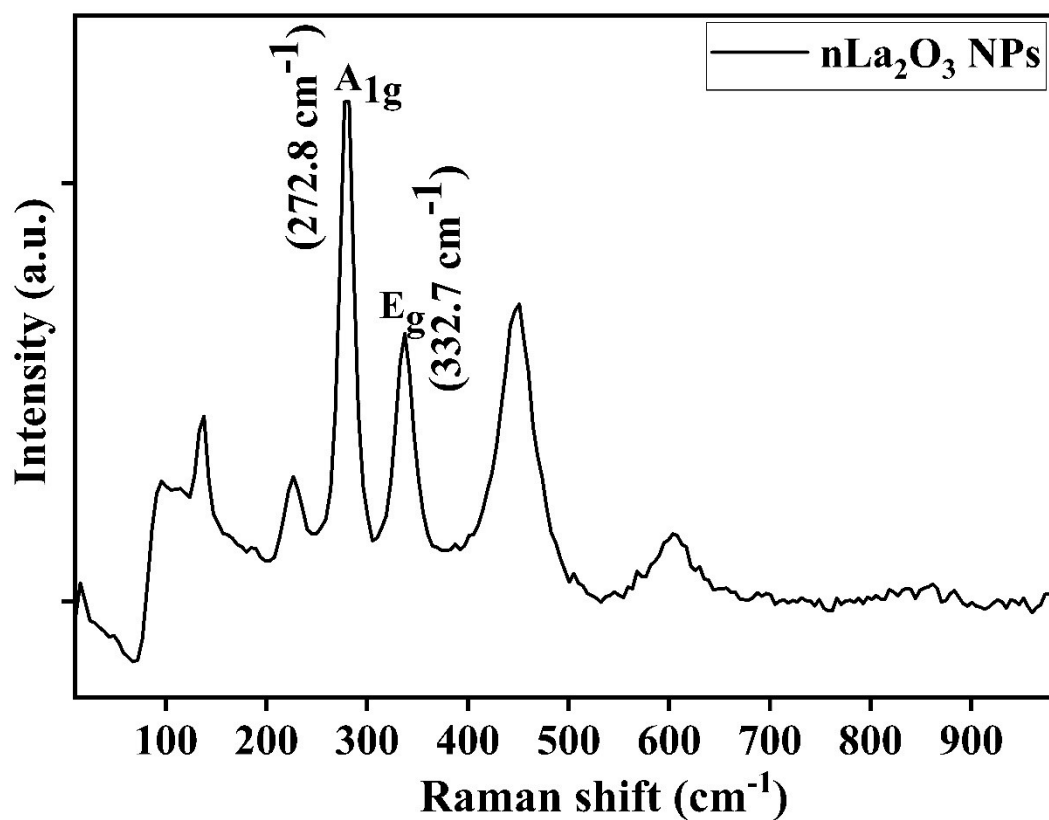

Figure S2: Raman spectra of nLa<sub>2</sub>O<sub>3</sub> NPs

## Contact angle studies

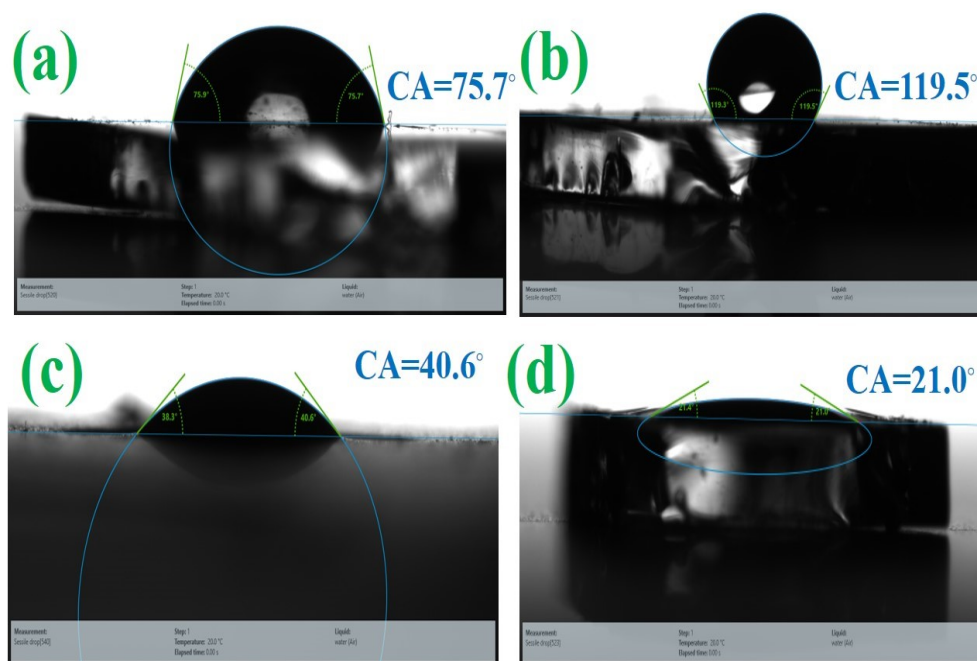

**Figure S3:** Water contact angle of ITO (a), APTES/nLa<sub>2</sub>O<sub>3</sub>@rGO/ITO (b), anti-CPX/APTES/nLa<sub>2</sub>O<sub>3</sub>@rGO/ITO (c) and BSA/anti-CPX/APTES/nLa<sub>2</sub>O<sub>3</sub>@rGO/ITO (d).

### EIS Studies:

The electrochemical impedance spectroscopic studies of ITO (curve i), APTES/nLa<sub>2</sub>O<sub>3</sub>@rGO/ITO (curve ii), anti-CPX/APTES/nLa<sub>2</sub>O<sub>3</sub>@rGO/ITO (curve iii) and BSA/anti-CPX/APTES/nLa<sub>2</sub>O<sub>3</sub>@rGO/ITO (curve iv) have been done in PBS solution containing 5 mM [Fe(CN)<sub>6</sub>]<sup>3-/4-</sup> in the frequency range of 100 kHz to 10 Hz [Fig. 5(d)]. The semicircle of Nyquist plot gives the charge transfer resistance ( $R_{ct}$ ) of electrode that depends on the dielectric features of electrode surface and electrolyte interface. The value of  $R_{ct}$  was obtained as 249.35  $\Omega$  for ITO glass substrate (curve i), which is the highest. However there is significant decrease in the value of  $R_{ct}$  205.2  $\Omega$  after the deposition of APTES/nLa<sub>2</sub>O<sub>3</sub>@rGO nanocomposite onto ITO surface (curve ii), indicates the high electrical conductivity of nLa<sub>2</sub>O<sub>3</sub>@rGO nanocomposite and fast diffusion of redox species [Fe(CN)<sub>6</sub>]<sup>3-/4-</sup> to the electrode surface. However, after the covalent immobilization of anti-CPX antibodies to the free -NH<sub>2</sub> sites of APTES functionalized nLa<sub>2</sub>O<sub>3</sub>@rGO nanocomposite, the value of  $R_{ct}$  drastically decreases to 165.58  $\Omega$  for anti-CPX/APTES/nLa<sub>2</sub>O<sub>3</sub>@rGO/ITO (curve iii). This decrease in the value of  $R_{ct}$  can be assigned to the spatial orientation of anti-CPX molecule onto electrode surface that facilitate increased charge transfer process between redox species [Fe(CN)<sub>6</sub>]<sup>3-/4-</sup> and free available functional group (NH<sub>2</sub>) of anti-CPX molecule (Kumar et al. 2015). The value of  $R_{ct}$  increases (176.42  $\Omega$ ; curve iv) after the BSA immobilization on the anti-CPX/APTES/nLa<sub>2</sub>O<sub>3</sub>@rGO/ITO immunoelectrode due to the macromolecular structure and insulating structure of BSA that hinder the charge transfer between redox species [Fe(CN)<sub>6</sub>] and electrode surface.

The heterogeneous electron transfer rate constant ( $K_{ct}$ ) for all respective electrodes was calculated using Eq.

$$K_{ct} = \frac{RT}{n^2 F^2 A R_{ct} [S]}$$

Where R is gas constant, T is the absolute temperature, n is the no. of transferred electrons per molecule of the redox probe, F is Faraday constant, A is the surface area of the electrode (cm<sup>2</sup>) and [S] is the concentration of redox probe. The  $K_{ct}$  value of ITO electrode was found as  $2.006 \times 10^{-6}$  while in the case of APTES/nLa<sub>2</sub>O<sub>3</sub>@rGO/ITO the value of  $K_{ct}$  increases to  $3.044 \times 10^{-6}$

exhibiting the faster electron transfer between the APTES/nLa<sub>2</sub>O<sub>3</sub>@rGO/ITO electrode and redox species. After immobilization of anti-CPX, the value of K<sub>ct</sub> again increases to 4.329 × 10<sup>-6</sup> shows the fast electron exchange between immunoelectrode and redox species. However, after the BSA immobilization on anti-CPX/APTES/nLa<sub>2</sub>O<sub>3</sub>@rGO/ITO immunoelectrode, the value of K<sub>ct</sub> decreases to 2.160 × 10<sup>-6</sup>, due to its insulating nature which resist the electron transfer.

The Time constant (τ) for each electrode has been calculated using the given equation as below

$$R_{ct} \cdot C_{dl} = 1 / 2\pi f_{max} = \tau$$

After the EPD of APTES/nLa<sub>2</sub>O<sub>3</sub>@rGO on ITO substrate there is abrupt decrease in value of time constant was found as compared to ITO glass substrate (8.938 × 10<sup>-4</sup> s). It reveals the fast diffusion of [Fe(CN)<sub>6</sub>]<sup>3-/4-</sup> ions at the interface of electrolyte and APTES/nLa<sub>2</sub>O<sub>3</sub>@rGO/ITO electrode. The immobilization of anti-CPX on to the APTES/nLa<sub>2</sub>O<sub>3</sub>@rGO/ITO result in decrease of τ value 2.716 × 10<sup>-4</sup> s due to the fast diffusion of [Fe(CN)<sub>6</sub>]<sup>3-/4-</sup> ions. After the BSA immobilization the value of τ again increases (2.724 × 10<sup>-4</sup> s) due the insulating behavior of BSA.

**Table S1.** EIS features of various electrodes

| Electrode                                                      | Charge transfer Resistance (R <sub>ct</sub> ) | Heterogeneous electron transfer rate constant [K <sub>ct</sub> (cms <sup>-1</sup> )] | Time constant (τ) s      |
|----------------------------------------------------------------|-----------------------------------------------|--------------------------------------------------------------------------------------|--------------------------|
| ITO                                                            | 249.35 Ω                                      | 2.006 × 10 <sup>-6</sup>                                                             | 8.938 × 10 <sup>-4</sup> |
| APTES/nLa <sub>2</sub> O <sub>3</sub> NPs@rGO/ITO              | 205.2 Ω                                       | 3.044 × 10 <sup>-6</sup>                                                             | 5.631 × 10 <sup>-4</sup> |
| anti-CPX/APTES/nLa <sub>2</sub> O <sub>3</sub> NPs@rGO/ITO     | 165.58 Ω                                      | 4.329 × 10 <sup>-6</sup>                                                             | 2.716 × 10 <sup>-4</sup> |
| BSA/anti-CPX/APTES/nLa <sub>2</sub> O <sub>3</sub> NPs@rGO/ITO | 176.42 Ω                                      | 2.160 × 10 <sup>-6</sup>                                                             | 2.724 × 10 <sup>-4</sup> |
